# Supplementary material for: Human Senataxin Resolves RNA/DNA Hybrids Formed at Transcriptional Pause Sites to Promote Xrn2-Dependent Termination
Source: PubMed Central journal article supplement (PMC3145960; doi:10.1016/j.molcel.2011.04.026), 2011-06-24
Supplement: mmc1.pdf [file mmc1.pdf]

**Supplemental Information**

**Molecular Cell, Volume 42**

**Human Senataxin Resolves RNA/DNA Hybrids**

**Formed at Transcriptional Pause Sites**

**to Promote Xrn2-Dependent Termination**

Konstantina Skourti-Stathaki, Nicholas J. Proudfoot, and Natalia Gromak

## A qRT-PCR

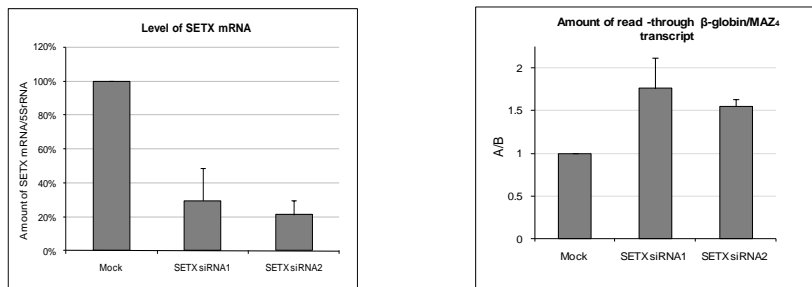

## B RNase protection analysis

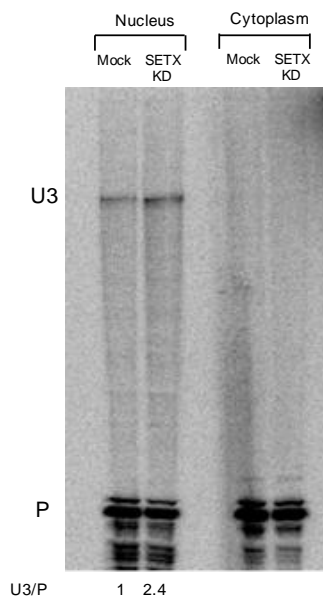

**Figure S1, Related to Figure 1. Transcriptional Termination Defect of  $\beta$ -Globin/MAZ<sub>4</sub> Construct in HeLa Cells Treated with SETX siRNA 2**

(A) RNAi-mediated depletion of human senataxin in HeLa cells using SETX siRNA 1 and 2. Left panel: qRT-PCR analysis of mock- and senataxin siRNA-treated HeLa cells. Bars represent average values  $\pm$  SD from three independent biological experiments. 5S rRNA was used as an internal control. The amount of SETX mRNA in mock cells was taken as 100%. Right panel: Termination efficiency of  $\beta$ -globin/MAZ<sub>4</sub> construct from mock-treated and cells treated with SETX siRNA1 and siRNA2, using qRT-PCR analysis on the total RNA. Amount of read-through transcript was calculated as a ratio of RT-PCR product A, representing read-through RNA, vs RT-PCR product B, representing the level of efficient transcriptional initiation. The A/B ratio in mock-treated cells was taken as 1. Bars represent average values  $\pm$  SD from three independent biological experiments.

(B) RNase protection analysis of  $\beta$ -globin/MAZ<sub>4</sub> construct from mock-treated and HeLa cells treated with SETX siRNA 2, performed with P/U3 riboprobe (see Figure 1 for probe position). Correct transcription

initiation from the HIV promoter results in the protection of an 85 nt fragment (P) of the riboprobe. Read-through transcription results in full protection of the riboprobe giving a ~240nt band (U3). Enrichment of read-through transcripts in SETX-depleted cells as compared to mock-treated cells was calculated as a signal ratio of U3/P (right panel). U3/P ratio in mock-treated cells was taken as 1.

A

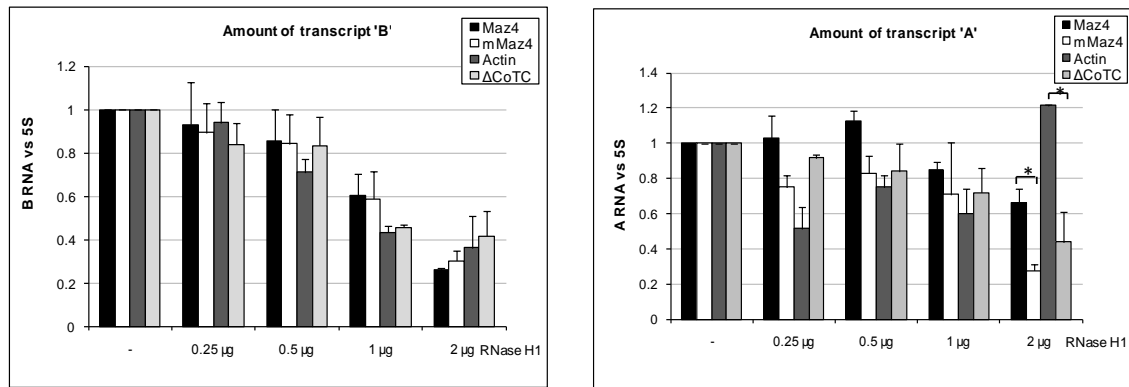

### Figure S2, Related to Figure 3. RNase H1 Promotes Transcriptional Read-Through

Amount of correctly initiated (amplicon B, left panel) and read-through (amplicon A, right panel)  $\beta$ -globin/ $\beta$ -actin,  $\beta$ -globin/MAZ<sub>4</sub>,  $\beta$ -globin/mMAZ<sub>4</sub> and  $\Delta$ CoTC transcripts in mock- cells (sample -) and HeLa cells, cotransfected with increasing amounts of GFP-RNase H1 plasmid. The absolute amount of transcripts detected was normalized to the amount of 5S rRNA. Average qRT-PCR values  $\pm$  SD from four independent biological experiments are presented. The amount of transcript B in mock-treated cells (sample -) was taken as 1. \* indicates significance ( $p < 0.05$ ), based on unpaired, two-tailed distribution Student's *t*-test.

It should be mentioned that the steady state transcript levels detected for A and B may be influenced by RNA degradation through RNase H1 treatment. We therefore employed nuclear run on analysis as an independent assay to measure nascent read-through transcription, which is unaffected by RNA turn-over (Figure 3C).

**Table S1, Related to Experimental Procedures. Oligonucleotide Sequences**

| <b>Name</b>                      | <b>Sequence (5' →3')</b>    |
|----------------------------------|-----------------------------|
| <b>β-Actin Gene</b>              |                             |
| prom (F)                         | CCG AAA GTT GCC TTT TAT GGC |
| prom (R)                         | CAA AGG CGA GGC TCT GTG C   |
| in1 (F)                          | CGG GGT CTT TGT CTG AGC     |
| in1 (R)                          | CAG TTA GCG CCC AAA GGA C   |
| in3 (F)                          | TAA CAC TGG CTC GTG TGA CAA |
| in3 (R)                          | AAG TGC AAA GAA CAC GGC TAA |
| in5 (F),                         | GGA GCT GTC ACA TCC AGG GTC |
| in5 (R)                          | TGC CAC TGG CTC GTG TGA CAA |
| 5'pause (F)                      | TTA CCC AGA GTG CAG GTG TG  |
| 5'pause (R)                      | CCC CAA TAA GCA GGA ACA GA  |
| pause (F)                        | GGG ACT ATT TGG GGG TGT CT  |
| pause (R)                        | TCC CAT AGG TGA AGG CAA AG  |
| C (F)                            | TGG GCC ACT TAA TCA TTC AAC |
| C (R)                            | CCT CAC TTC CAG ACT GAC AGC |
| D (F)                            | CAG TGG TGT GGT GTG ATC TTG |
| D (R)                            | GGC AAA ACC CTG TAT CTG TGA |
| F (F)                            | CCA TCA CGT CCA GCC TAT TT  |
| F (R)                            | TGT GTG AGT CCA GGA GTT GG  |
| <b>β-Globin Based Constructs</b> |                             |
| 5' ex1 (F)                       | GAG TTA GCT CAC TCA TTA GGC |
| 5' ex1 (R)                       | CTG TGT GAA ATT GTT ATC CGC |
| ex1 (F)                          | GAA CCC ACT GCT TAA GCC TC  |
| ex1 (R)                          | CCT CAC CAC CAA CTT CAT CC  |
| ex2 (F)                          | TTG GAC CCA GAG GTT CTT TG  |
| ex2 (R)                          | GAG CCA GGC CAT CAC TAA AG  |
| ex3 (F)                          | AGC TCC TGG GCA ACG TGC TGG |
| ex3 (R)                          | TTG TGG GCC AGG GCA TTA GCC |
| 3'pA (F)                         | AAA AGG GAA TGT GGG AGG TC  |
| 3'pA (R)                         | AGC CTC ACC TTC TTT CAT GG  |
| 5'pause (F)                      | CTG CAA ACA GCT AAT GCA CA  |
| 5'pause (R)                      | TGA ATC CTT TTC TGA GGG ATG |
| pause (F)                        | GGG ACT ATT TGG GGG TGT CT  |
| pause (R)                        | GTT TTC CCA GTC ACG ACG TT  |
| 3'MAZ (F)                        | GGA AAC TAT TAC TCA AAG GG  |
| 3'MAZ (R)                        | GTT TTC CCA GTC ACG ACG TT  |
| A (F)                            | TTG CCT TCC TGT TTT TGC TC  |
| A (R)                            | CCG CTG TTG AGA TCC AGT TC  |
| intr1-ex2 (F)                    | GGA GAC CAA TAG AAA CTG GGC |
| <b>5S rRNA</b>                   |                             |
| 5S (F)                           | AGC GTC TAC GGC CAT ACC     |
| 5S (R)                           | GGT ATT CCC AGG CGG TCT C   |
| <b>SETX</b>                      |                             |
| SETX (F)                         | CTT CAT CCT CGG ACA TTT GAG |
| SETX (R)                         | TTA ATA ATG GCA CCA CGC TTC |

## **Supplemental Experimental Procedures**

### **Nuclear Run-On Analysis**

NRO procedure and positions of the NRO probes were described previously (Ashe et al., 1997; Dye and Proudfoot, 1999; West et al., 2004). The Br-UTP NRO was carried out largely as described (Lin et al., 2008) with some modifications. Nuclear pellets were resuspended in Transcription Buffer (40 mM Tris-HCl pH 7.9, 300 mM KCl, 10mM MgCl<sub>2</sub>, 40% glycerol, 2 mM DTT) and 10 mM mix of rATP, rCTP, rGTP, and Br-UTP or rUTP (in the control samples). The NRO reaction was performed at 30°C for 30 min. Total RNA was isolated using TRIzol reagent (Invitrogen) according to manufacturers' instructions and treated with RNase-free DNase I (Roche). 2 µl of anti-BrU antibody (Sigma) were pre-incubated with 30 µl of Protein G Dynabeads (Upstate) and 10 µg tRNA per sample for 1 hr at 4°. The beads were washed three times with RSB-100 buffer (10 mM Tris-HCl pH 7.4, 100 mM NaCl, 2.5 mM MgCl<sub>2</sub>, 0.4% Triton X-100) and resuspended in 150µl RSB-100 with 40U RNase-OUT (Invitrogen) and 5µg of glycogen. Total RNA was added to the beads and incubated for additional 1 hr at 4°C. Then the beads were washed three times with RSB-100 buffer. RNA-bound to the beads was extracted with TRIzol reagent followed by two DNase I treatments. The RT reaction was performed using SuperScript III Reverse Transcriptase (Invitrogen) following the manufacturers' instructions. The real-time quantitative PCR was performed using a Corbett Research Rotor-Gene GG-3000 machine. The PCR mixture contained QuantiTest SYBR green PCR master mix (QIAGEN), 2 µl of template cDNA, and primers from the Table 1. Cycling parameters were 95°C for 15 min, followed by 50 cycles of 95°C for 15 s, 58°C for 20 s, and 72°C for 20 s. Fluorescence intensities were plotted against the number of cycles by using an algorithm provided by the manufacturer. The data was presented as a fold of enrichment of BrU-RNA over the U-RNA produced over a specific probe.

### **Senataxin RNAi and Western Blot Analysis**

mRNA target sequence for SETX siRNA1 was 5'-GCCAGAUCGUAUACAAUUA-3' (Dharmacon) and for SETX siRNA2 -5'-CAATGGGTGGAAGCCGTCGTCAAAT-3' (Invitrogen). Western blotting was performed on 60 µg of total HeLa cell protein extract with antibodies raised against senataxin (Bethyl Laboratories Inc.) at 1:1000 dilution, GFP (AbCam) at 1:2000 dilution and actin (Sigma) at 1:2000 dilution.

## **Supplemental References**

Ashe, H.L., Monks, J., Wijgerde, M., Fraser, P., and Proudfoot, N.J. (1997). Intergenic transcription and transinduction of the human beta-globin locus. *Genes Dev.* *11*, 2494–2509.
